# Supplementary material for: Immunogenicity and Safety of a 3-Antigen Hepatitis B Vaccine vs a Single-Antigen Hepatitis B Vaccine: A Phase 3 Randomized Clinical Trial
Source: PubMed Central journal article supplement — JAMA Netw Open. 2021 Oct 12;4(10):e2128652. doi: 10.1001/jamanetworkopen.2021.28652 (PMC8511978; doi:10.1001/jamanetworkopen.2021.28652), 2021-10-12
Supplement: jamanetwopen-e2128652-s003.pdf [file jamanetwopen-e2128652-s003.pdf]

\*Indicates required information. Only first name, last name, and suffix will appear in PubMed.

| <b>*Group Name(s): CONSTANT Study Group</b> |                   |                              |                  |                                                                             |                                          |                                                         |                                                                                            |
|---------------------------------------------|-------------------|------------------------------|------------------|-----------------------------------------------------------------------------|------------------------------------------|---------------------------------------------------------|--------------------------------------------------------------------------------------------|
| <b>*First Name and Middle Initial(s)</b>    | <b>*Last Name</b> | <b>*Suffix (eg, Jr, III)</b> | Academic Degrees | Institution                                                                 | Location (city, state/province, country) | Role or Contribution, eg, chair, principal investigator | Group (if more than 1 Group listed in the byline) and/or Subgroup (eg, Steering Committee) |
| Bruce                                       | Rankin            |                              | D.O, CPI         | Avail Clinical Research                                                     | Deland, Florida, USA                     | Principal Investigator                                  |                                                                                            |
| Mary B                                      | Manning           |                              | MD               | Rapid Medical Research                                                      | Cleveland, Ohio, USA                     | Principal Investigator                                  |                                                                                            |
| Carl                                        | Griffin           |                              | MD               | Lynn Health Science Institute                                               | Oklahoma City, Oklahoma, USA             | Principal Investigator                                  |                                                                                            |
| Amina Z                                     | Haggag            |                              | MD               | Anaheim Clinical Trials                                                     | Anaheim, California, USA                 | Principal Investigator                                  |                                                                                            |
| Mark E                                      | Kutner            |                              | MD               | Suncoast Research Group                                                     | Miami, Florida, USA                      | Principal Investigator                                  |                                                                                            |
| Mark                                        | Turner            |                              | MD               | Advanced Clinical Research - Boise, ID                                      | Boise, Idaho, USA                        | Principal Investigator                                  |                                                                                            |
| Barbara                                     | Rizzardi          |                              | MD               | Advanced Clinical Research - Salt Lake, UT                                  | Salt Lake, Utah, USA                     | Principal Investigator                                  |                                                                                            |
| Williams                                    | Hayes             |                              | MD               | Achieve Clinical Research                                                   | Birmingham, Alabama, USA                 | Principal Investigator                                  |                                                                                            |
| Michael                                     | Levin             |                              | MD               | Clinical Research Center of Nevada                                          | Las Vegas, Nevada, USA                   | Principal Investigator                                  |                                                                                            |
| Hamilton                                    | Sah               |                              | MD               | Care One                                                                    | North Hollywood, California, USA         | Principal Investigator                                  |                                                                                            |
| Naveen                                      | Garg              |                              | MD               | Manna Research                                                              | Montreal, Quebec, Canada                 | Principal Investigator                                  |                                                                                            |
| Aino                                        | Forsten           |                              | MD               | Tampere Vaccine Research Clinic                                             | Tampere, Finland                         | Principal Investigator                                  |                                                                                            |
| Ilkka                                       | Seppä             |                              | MD               | Turku Vaccine Research Clinic                                               | Turku, Finland                           | Principal Investigator                                  |                                                                                            |
| Maija                                       | Rössi             |                              | MD               | Pori Vaccine Research Clinic                                                | Pori, Finland                            | Principal Investigator                                  |                                                                                            |
| Anitta                                      | Ahonen            |                              | MD               | Järvenpää Vaccine Research Clinic and Helsinki East Vaccine Research Clinic | Järvenpää, Finland                       | Principal Investigator                                  |                                                                                            |
| Olli                                        | Henriksson        |                              | MD               | Helsinki South Vaccine Research Clinic                                      | Helsinki, Finland                        | Principal Investigator                                  |                                                                                            |
| Benita                                      | Ukkonen           |                              | MD               | Espoo Vaccine Research Clinic                                               | Espoo, Finland                           | Principal Investigator                                  |                                                                                            |
| Satu                                        | Kokko             |                              | MD               | Oulu Vaccine Research Clinic                                                | Oulu, Finland                            | Principal Investigator                                  |                                                                                            |
| Outi                                        | Laajalahti        |                              | MD               | Seinäjoki Vaccine Research Clinic                                           | Seinäjoki, Finland                       | Principal Investigator                                  |                                                                                            |
| Pauliina                                    | Paavola           |                              | MD               | Kokkola Vaccine Research Clinic                                             | Kokkola, Finland                         | Principal Investigator                                  |                                                                                            |
