# Supplementary material for: Immunogenicity and Safety of a 3-Antigen Hepatitis B Vaccine vs a Single-Antigen Hepatitis B Vaccine: A Phase 3 Randomized Clinical Trial
Source: PubMed Central journal article supplement — JAMA Netw Open. 2021 Oct 12;4(10):e2128652. doi: 10.1001/jamanetworkopen.2021.28652 (PMC8511978; doi:10.1001/jamanetworkopen.2021.28652), 2021-10-12
Supplement: jamanetwopen-e2128652-s004.pdf [file jamanetwopen-e2128652-s004.pdf]

## **Data Sharing Statement**

Vesikari. Immunogenicity and Safety of a 3-Antigen Hepatitis B Vaccine vs a Single-Antigen Hepatitis B Vaccine. *JAMA Netw Open*. Published October 11, 2021. doi:10.1001/jamanetworkopen.2021.28652

## **Data**

Data available: No
